# Supplementary material for: Detection of Circulating miRNA Levels in Schizophrenia
Source: Atypon-hosted journal article supplement (doi:10.1176/appi.ajp.2015.14030273), 2015-07-17
Supplement: appi.ajp.2015.14030273.ds001.pdf [file appi.ajp.2015.14030273.ds001.pdf]

**FIGURE S1:** A flow chart of project strategy.

## Over view of strategy

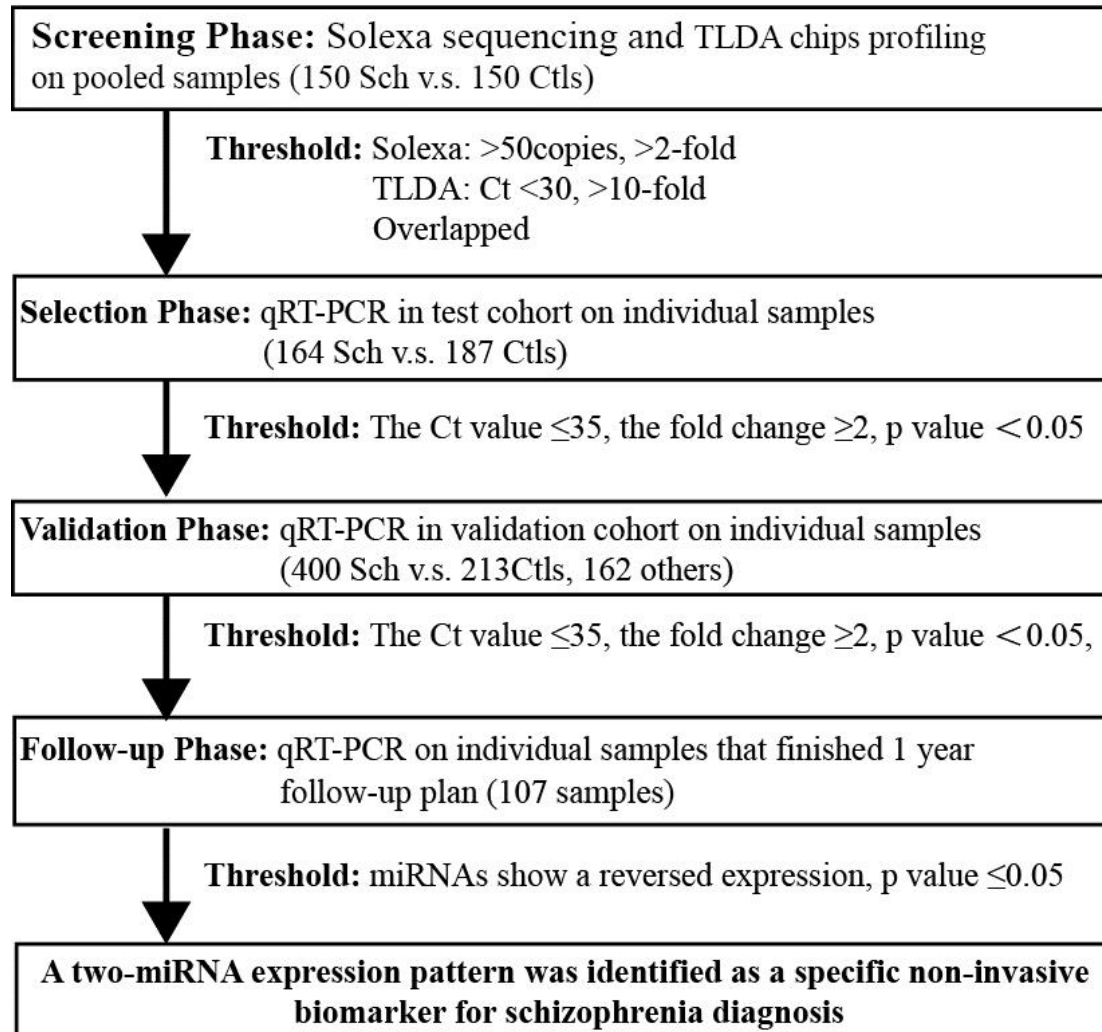

**FIGURE S2 A–C:** The representative standard curve for synthetic single-strand hsa-miR-16, has-miR-130b and has-miR-193a-3p, which were synthesized by Life Technologies, USA). The standard calibration curve was prepared by a 10-fold serial dilution of synthetic miRNAs from 10 fmol/L to 10<sup>7</sup> fmol/L, respectively, and the level of each miRNA was assessed by the qRT-PCR assay. The resulting C<sub>T</sub> values were plotted versus the log<sub>10</sub> of the amount of synthetic hsa-miRNAs. Each point represents the mean of four independent experiments.

A

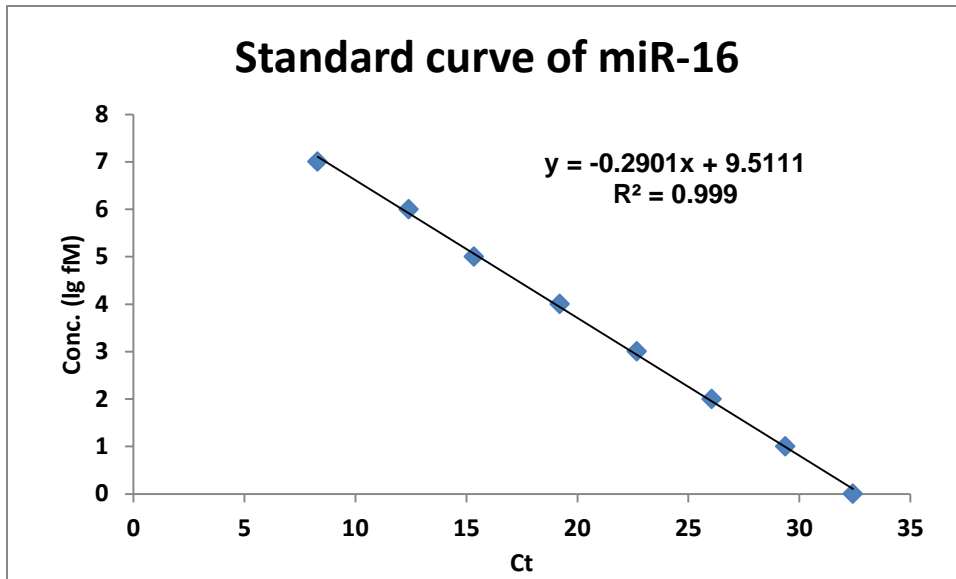

B

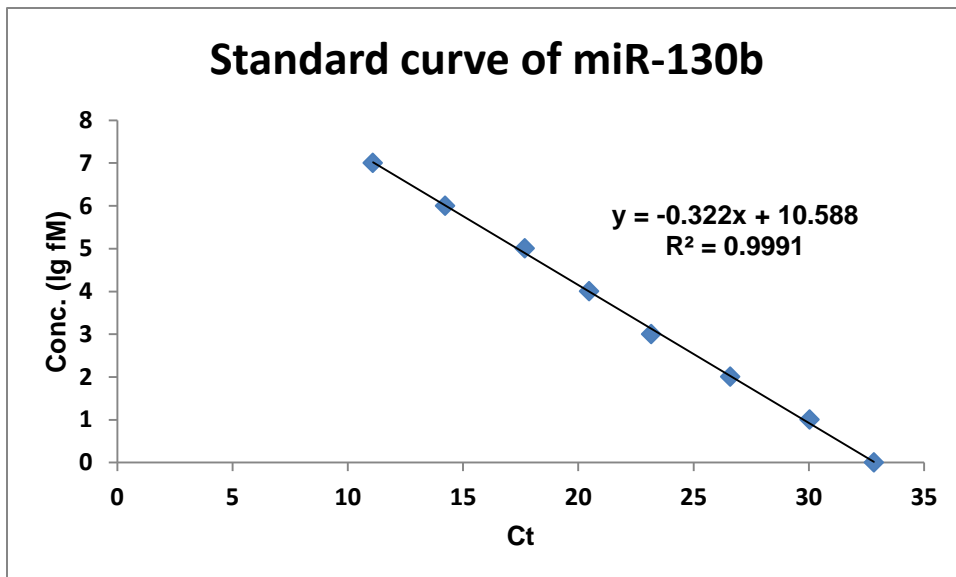

C

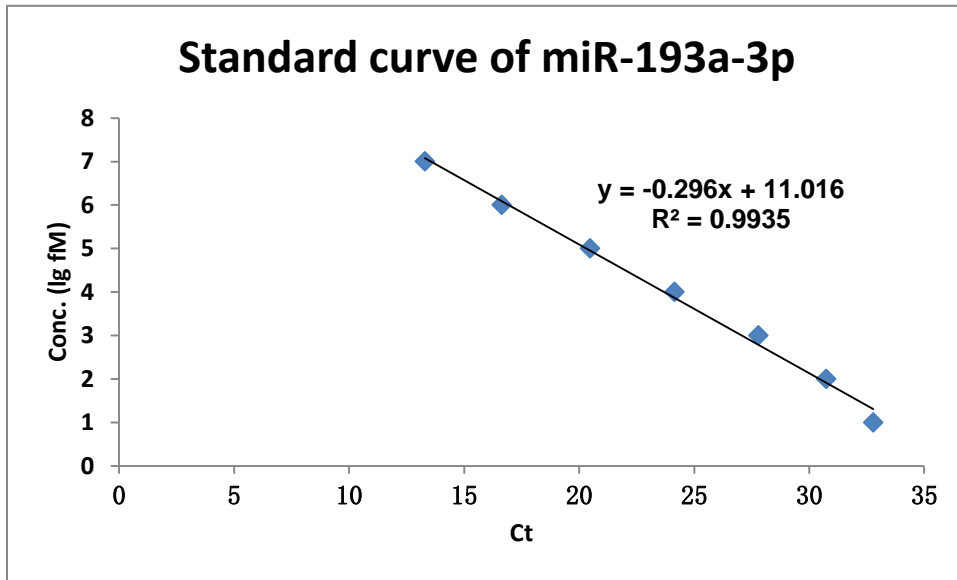

**FIGURE S3:** The distribution of length and components of RNAs in pooled RNA samples. Based on their distribution, miRNAs are main components in total plasma RNA. A represents the control samples and B, the case samples. C shows the components of plasma RNAs in pooled control samples, and D, in pooled case samples.

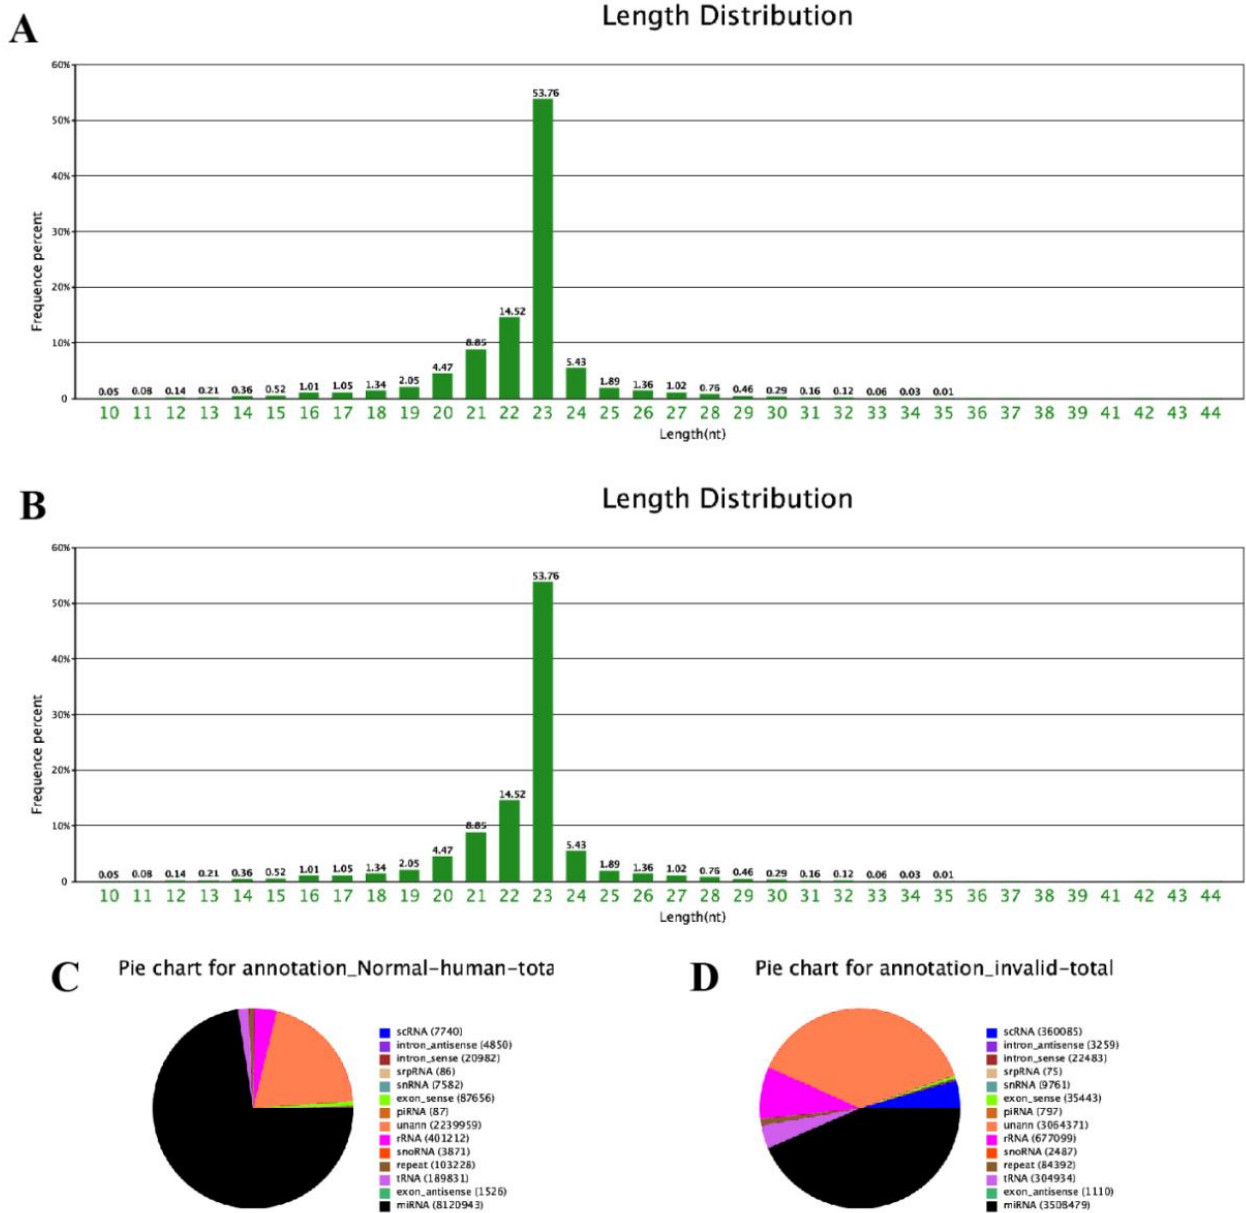

**FIGURE S4:** The number of altered miRNAs in schizophrenia plasma captured by Solexa sequencing and TLDA chips

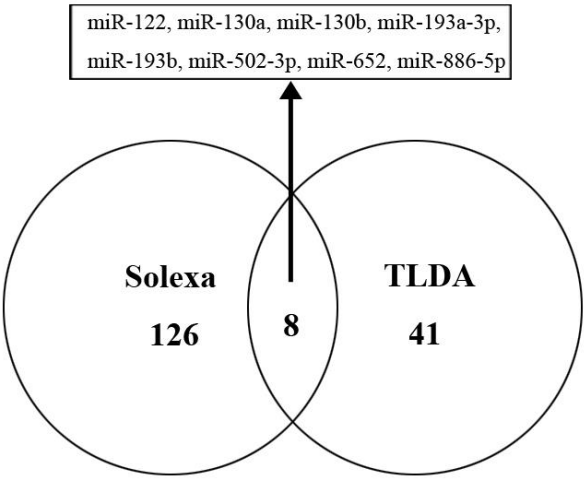

**TABLE S1.** Detailed information of patients with non-schizophrenia disorders

| <b>Disorders</b>                                | <b>Number of patients</b> |
|-------------------------------------------------|---------------------------|
| Major depression disorder                       | 84                        |
| Anxiety disorder,NOS                            | 23                        |
| Mixed anxiety and depressive disorder           | 12                        |
| Mild depressive episode                         | 7                         |
| Somatoform disorders                            | 4                         |
| Schizophrenic emotional disorders               | 3                         |
| Acute and transient psychiatric disorders, NOS  | 3                         |
| Schizophrenia-like disorders                    | 2                         |
| Other non-organic psychotic disorders           | 2                         |
| Other acute and transient psychiatric disorders | 2                         |
| Depressive episode, NOS                         | 2                         |
| Tic disorder                                    | 1                         |
| Dissociative[Conversive] disorders              | 1                         |
| Generalized anxiety disorder                    | 1                         |
| Acute schizophrenic psychiatric disorders       | 1                         |
| Acute stress reaction                           | 1                         |
| Acute stress disorder                           | 1                         |
| Tension-type stupor state                       | 1                         |
| Paranoid personality disorder                   | 1                         |
| Other neurosis disorders                        | 1                         |
| Alcohol-induced mental and behavioral disorders | 1                         |
| Bipolar disorders                               | 1                         |
| Bipolar disorders, mania at present             | 1                         |
| Sleep Disorder                                  | 1                         |
| Delusional disorder                             | 1                         |
| Undifferentiated somatoform disorder            | 1                         |
| No specific mental disorders                    | 1                         |
| Hypochondriac obstacles                         | 1                         |
| Depressive episode                              | 1                         |
| Total                                           | 162                       |

**TABLE S2.** Recruitment criteria for participants

| <b>Inclusion criteria</b>                                                                                                                            | <b>Exclusion criteria</b>                                           |
|------------------------------------------------------------------------------------------------------------------------------------------------------|---------------------------------------------------------------------|
| <b>Patients</b>                                                                                                                                      |                                                                     |
| Inform consents signed by patients or guardians                                                                                                      | Brain organic diseases or other intercurrent clinical body diseases |
| Chinese Han                                                                                                                                          | Head trauma history, lost consciousness over 30min                  |
| Diagnosed of schizophrenia by DSM-IV                                                                                                                 | Diagnosed of other psychosis by DSM-IV                              |
| 16≤age≤45                                                                                                                                            | Alcohol or other substance dependence or abuse                      |
| First episode, duration less than 3 years                                                                                                            | Anti-psychiatric drug contraindications involve in this study       |
| Without systematic anti-psychiatric treatment, continuous regular medication less than 1 month or continuous irregular medication less than 3 months | Participated in other clinical drug trails in 30 days               |
| Education≥3 years                                                                                                                                    | Hypophrenia                                                         |
|                                                                                                                                                      | Seizures                                                            |
|                                                                                                                                                      | Pregnant or breastfeeding women                                     |
| <b>Controls</b>                                                                                                                                      |                                                                     |
| Healthy blood donors, male or female                                                                                                                 | Accord with the inclusion or exclusion criteria of patient group    |
|                                                                                                                                                      | Family history of mental or neurological disorders                  |
|                                                                                                                                                      | Suffered severe head trauma or birth trauma                         |
|                                                                                                                                                      | Suffered febrile convulsion                                         |
|                                                                                                                                                      | Adopted or single-parent in childhood                               |

**TABLE S3.** The recovery rates of miR-130b assay under two external standard curves.

| <b>Dilution</b> | <b>Calibration curves</b> |                 |
|-----------------|---------------------------|-----------------|
|                 | <b>miR-16</b>             | <b>miR-130b</b> |
| <b>1</b>        | <b>0.38</b>               | <b>1.24</b>     |
| <b>2</b>        | <b>0.30</b>               | <b>0.89</b>     |
| <b>4</b>        | <b>0.29</b>               | <b>0.80</b>     |
| <b>8</b>        | <b>0.28</b>               | <b>0.70</b>     |
| <b>16</b>       | <b>0.33</b>               | <b>0.80</b>     |
| <b>32</b>       | <b>0.40</b>               | <b>0.91</b>     |
| <b>64</b>       | <b>0.51</b>               | <b>1.11</b>     |
| <b>128</b>      | <b>0.58</b>               | <b>1.17</b>     |

The mean±SD was 0.384±0.110 from the miR-16 calibration curve and that was 0.845±0.103 from the miR-miR-130b calibration curve. Pearson correlation analysis shows  $r=0.384$ ,  $df=6$ ,  $p=0.032$ .

**TABLE S4.** The recovery rates of miR-193a-3p assay under two external standard curves.

| <b>Dilution</b> | <b>Calibration curves</b> |                    |
|-----------------|---------------------------|--------------------|
|                 | <b>miR-16</b>             | <b>miR-193a-3p</b> |
| <b>1</b>        | <b>0.04</b>               | <b>0.96</b>        |
| <b>2</b>        | <b>0.04</b>               | <b>0.98</b>        |
| <b>4</b>        | <b>0.03</b>               | <b>0.67</b>        |
| <b>8</b>        | <b>0.04</b>               | <b>0.81</b>        |
| <b>16</b>       | <b>0.03</b>               | <b>0.79</b>        |
| <b>32</b>       | <b>0.04</b>               | <b>0.79</b>        |
| <b>64</b>       | <b>0.04</b>               | <b>0.87</b>        |
| <b>128</b>      | <b>0.04</b>               | <b>0.90</b>        |

The mean±SD was 0.034±0.004 from the miR-16 calibration curve and that was 0.953±0.198 from the miR-193a-3p calibration curve. Pearson correlation analysis shows  $r=0.953$ ,  $df=6$   $p=0.0003$ .
